# Supplementary material for: Melatonin increases growth properties in human dermal papilla spheroids by activating AKT/GSK3β/β-Catenin signaling pathway
Source: PubMed Central journal article supplement (PMC9123888; doi:10.7717/peerj.13461), 2022-05-18
Supplement: peerj-10-13461-s006.pdf [file peerj-10-13461-s006.pdf]

1  
2  
3  
4  
5  
6  
7  
8  
9  
10  
11  
12  
13  
14  
15  
16  
17  
18  
19  
20  
21  
22  
23  
24  
25  
26  
27  
28  
29  
30  
31  
32  
33  
34  
35  
36  
37  
38  
39

## Supplement Materials & Methods

### Cell Culture and Reagents

pLenti-FoxO1-Clover was received as a gift from Peter Rotwein (Addgene plasmid # 67759) (Gross & Rotwein 2015), pCMV delta R8.2 was a gift from Didier Trono (Addgene plasmid # 12263), and pVpack-VSV-G was purchased from Stratagene (La Jolla, CA, USA).

### Cell Fractionation Analysis

Total cell lysates were prepared and protein extracts were obtained after lysis in RIPA buffer (25 mM Tris-Cl, 5 mM ethylenediaminetetraacetic acid, 150 mM NaCl, 1% NP40, 1% sodium deoxycholate, 0.025% sodium dodecyl sulfate) containing 200 mM phenylmethylsulfonyl fluoride.

### Luciferase Reporter Assay

293T cells ( $1 \times 10^5$  cells/well) were seeded and cultured for 24 h. The cells were then co-transfected with the TCF/LEF promoter-driven luciferase reporter plasmid and pSV- $\beta$ -galactosidase (pSV- $\beta$ -gal) plasmid using Lipofectamine reagent (Thermo Fisher Scientific). Four hours post-transfection, cells were treated with melatonin (10 nM, 10  $\mu$ M, and 1 mM). At 24 and 48 h post-treatment, transfected cells were lysed using passive lysis buffer (Promega). To determine luminescence, the cell lysates were incubated with d-luciferin (Sigma-Aldrich) and luciferase activity was measured using a Synergy HTX Multi-Mode Microplate Reader (Biotech). Beta-galactosidase activity was measured using the Luminescent  $\beta$ -galactosidase detection kit II (Takara Bio Inc., Tokyo, Japan). Relative luciferase activity was calculated by normalizing luciferase activity to  $\beta$ -galactosidase activity.

### Generation of AKT-Reporter Stable HeLa Cell Lines

The HeLa/FoxO1-Clover cell line capable of visualizing AKT activity by a FoxO1-tagged Clover fluorescent reporter was established by lentiviral transduction. Briefly, 293T cells ( $5 \times 10^5$ ) were transfected with pLenti-FoxO1-Clover (Addgene plasmid # 67759), pVpack-VSV-G (Stratagene), and pCMV delta R8.2 (Addgene plasmid #12263) plasmids using Lipofectamine reagent (Thermo Fisher Scientific, Waltham, MA, USA), and viral supernatants were harvested after 48 h. HeLa cells ( $2 \times 10^5$ ) were subsequently transduced and selected using 1  $\mu$ g/mL puromycin (Amresco, Solon, OH, USA) for 2 weeks. For the experiments, HeLa/foxO1-Clover cells were seeded ( $1 \times 10^5$ ) in 24 well plates. Cells were then treated with melatonin (0, 200, 400  $\mu$ M, and 2 mM) under serum starvation conditions for AKT inhibition. After 24 h, the subcellular localization of Foxo1-Clover was observed using an ultraviolet (UV) microscope Axiovert 200 (ZEISS, Germany).

## References

41 Gross SM, and Rotwein P. 2015. Akt signaling dynamics in individual cells. *Journal of cell*  
42 *science* 128:2509-2519.  
43  
44  
45  
46  
47
