# Supplementary material for: Melatonin increases growth properties in human dermal papilla spheroids by activating AKT/GSK3β/β-Catenin signaling pathway
Source: PeerJ journal article supplement (doi:10.7717/peerj.13461), 2022-05-18
Supplement: Supplementary_file_1.zip [file Supplementary_file_1.zip]

## Sheet: figure1
	qRT-PCR
	A	MTNR1A				MTNR1B
		HDP	HDF	HEK		HDP	HDF	HEK
	RQ	5.18458	1.1742	1	RQ	10.5762	1.67666	1
	RQ(min)	3.72167	1.01274	0.854694	RQ(min)	8.85708	0.954769	0.840135
	RQ(max)	7.22253	1.3614	1.17001	RQ(max)	12.629	2.94438	1.19029
	aver	5.37626	1.18278	1.00823	aver	10.6874	1.8586	1.01014
		514.224	116.461	99.1833		1047.01	165.983	98.9962
		369.128	100.447	84.7714		876.817	94.5185	83.1701
		716.354	135.028	116.045		1250.23	291.482	117.834
	aver %	533.235	117.312	100	aver %	1058.02	183.995	100
	Western Blotting
	B
		HDP	HDF	HEK		HDP	HDF	HEK		HDP	HDF	HEK
	Original Band
	Antibody	MTNR1A				MTNR1B				β-actin
	size	45-kDa				39-kDa				42-kDa
	dillution	1/1000				1/1000				1/5000
	Blocking	2% skim milk				2% skim milk				2% skim milk
	qRT-PCR
	C	MTNR1A		MTNR1B
		2D	3D	2D	3D
	RQ	6.52979	6.59045	36.3695	52.8261
	RQ(min)	4.56195	5.18008	34.2903	44.657
	RQ(max)	9.34648	8.38482	38.5747	62.4896
	aver	6.81274	6.71845	36.4115	53.3242
		95.8468	96.7371	533.845	775.402
		66.9621	76.0352	503.327	655.493
		137.191	123.076	566.215	917.246
	aver %	100	98.616	534.462	782.714

## Sheet: figure2
	Cell viability analysis of melatonin in HDP cells
	A
	Melatonin (mM)		0	0.1	0.25	0.5	0.75	1	2.5	5	blank
	O.D. Wavelength : 450.0		0.566	0.56	0.549	0.545	0.563	0.532	0.545	0.493	0.227375
			0.548	0.542	0.573	0.56	0.563	0.564	0.522	0.5
			0.583	0.547	0.574	0.535	0.554	0.596	0.473	0.489
			0.562	0.549	0.562	0.568	0.571	0.545	0.546	0.519
			0.584	0.546	0.516	0.577	0.621	0.606	0.541	0.469
	blank correction		0.338625	0.332625	0.321625	0.317625	0.335625	0.304625	0.317625	0.265625
			0.320625	0.314625	0.345625	0.332625	0.335625	0.336625	0.294625	0.272625
			0.355625	0.319625	0.346625	0.307625	0.326625	0.368625	0.245625	0.261625
			0.334625	0.321625	0.334625	0.340625	0.343625	0.317625	0.318625	0.291625
			0.356625	0.318625	0.288625	0.349625	0.393625	0.378625	0.313625	0.241625
	aver		0.341225	0.321425	0.327425	0.329625	0.347025	0.341225	0.298025	0.266625
	O.D/aver*100		99.238	97.4797	94.256	93.0837	98.3589	89.2739	93.0837	77.8445
			93.9629	92.2046	101.289	97.4797	98.3589	98.6519	86.3433	79.896
			104.22	93.6699	101.583	90.1531	95.7213	108.03	71.9833	76.6723
			98.0658	94.256	98.0658	99.8242	100.703	93.0837	93.3768	85.4641
			104.513	93.3768	84.585	102.462	115.356	110.961	91.9115	70.811
	%aver		100	94.1974	95.9557	96.6005	101.7	100	87.3397	78.1376
	Spheroids size of HDP cells
	B
	hours		0 h				48 h				96 h
	Melatonin (mM)		0	0.5	0.75	1	0	0.5	0.75	1	0	0.5	0.75	1
	Spheroids size Scale bars present : 200 µm		317.63	320.54	315.8	314.4	273.77	289.8	307.63	296.97	228.46	256.2	282.6	282.13
			320.48	318.21	317.69		283.23	305.57	304.93		233.37	264	272
			317.98	320.2	315.94	317.19	273.1	291.17	305.97	297.7	227.77	253.9	274.93	273.5
	aver		318.697	319.65	316.477	315.795	276.7	295.513	306.177	297.335	229.867	258.033	276.51	277.815
	Spheroids size/aver*100		99.6653	100.578	99.0911	98.6518	98.9411	104.734	111.178	107.326	99.3881	111.456	122.941	122.736
			100.56	99.8473	99.6841		102.36	110.434	110.202		101.524	114.849	118.329
			99.7751	100.472	99.135	99.5272	98.699	105.229	110.578	107.589	99.0879	110.455	119.604	118.982
	%aver		100	100.299	99.3034	99.0895	100	106.799	110.653	107.458	100	112.253	120.291	120.859

## Sheet: figure3
	qRT-PCR
	ALP					VCAN					BMP2					WNT5A
	A	Melatonin (mM)				B	Melatonin (mM)				C	Melatonin (mM)				D	Melatonin (mM)
		0	0.75	1			0	0.75	1			0	0.75	1			0	0.75	1
	RQ	1	1.48351	1.67287		RQ	1	1.28082	1.57911		RQ	1	1.67098	1.88336		RQ	1	1.20796	1.25439
	RQ(min)	0.776302	1.32663	1.38879		RQ(min)	0.942171	1.14565	1.44614		RQ(min)	0.915303	1.53475	1.61913		RQ(min)	0.930767	1.03505	1.08466
	RQ(max)	1.28816	1.65895	2.01505		RQ(max)	1.06138	1.43193	1.72431		RQ(max)	1.09253	1.81929	2.19072		RQ(max)	1.07438	1.40976	1.45069
	aver	1.02149	1.4897	1.69224		aver	1.00118	1.28613	1.58319		aver	1.00261	1.67501	1.89774		aver	1.00172	1.21759	1.26325
		97.8965	145.231	163.768			99.8818	127.93	157.725			99.7394	166.662	187.845			99.8286	120.589	125.225
		75.9972	129.873	135.958			94.1058	114.429	144.443			91.2918	153.076	161.491			92.9172	103.328	108.28
		126.106	162.405	197.266			106.012	143.024	172.227			108.969	181.455	218.501			107.254	140.734	144.82
	aver %	100	145.836	165.664		aver %	100	128.461	158.132		aver %	100	167.064	189.279		aver %	100	121.551	126.108
	Western Blotting
	E	Melatonin (mM)				Melatonin (mM)				Melatonin (mM)				Melatonin (mM)				Melatonin (mM)
		0	0.75	1		0	0.75	1		0	0.75	1		0	0.75	1		0	0.75	1
	Original band
	Antibody	ALP				VCAN				WNT5A				BMP2				β-actin
	size	57-kDa				70-kDa				45-kDa				45-kDa				42-kDa
	dilution	1/1000				1/1000				1/1000				1/1000				1/5000
	Blocking	2% skim milk				2% skim milk				2% skim milk				2% skim milk				2% skim milk
	qRT-PCR
	BMP2							WNT5A
	F	Melatonin(1mM)	-	-	+	+		G	Melatonin(1mM)	-	-	+	+
		Luzindole(50 μM)	-	+	-	+			Luzindole(50 μM)	-	+	-	+
	RQ		1	0.900927	2.38792	1.29034		RQ		1	1.01728	1.33966	0.833084
	RQ(min)		0.926487	0.794955	1.96696	1.09666		RQ(min)		0.917946	0.968829	1.21089	0.665734
	RQ(max)		1.07935	1.02103	2.89899	1.51822		RQ(max)		1.08939	1.06815	1.48213	1.0425
	aver		1.00194	0.905636	2.41796	1.30174		aver		1.00244	1.01809	1.34422	0.847107
			99.8059	89.9179	238.329	128.783				99.7561	101.48	133.639	83.1052
			92.4689	79.3412	196.314	109.453				91.5707	96.6466	120.793	66.411
			107.725	101.904	289.336	151.527				108.673	106.554	147.851	103.996
	aver %		100	90.3878	241.326	129.921		aver %		100	101.56	134.095	84.5041
	Western Blotting
	H	Melatonin(1mM)	-	-	+	+			Melatonin(1mM)	-	-	+	+			Melatonin(1mM)	-	-	+	+
		Luzindole(50 μM)	-	+	-	+			Luzindole(50 μM)	-	+	-	+			Luzindole(50 μM)	-	+	-	+
	Original band
	Antibody	BMP2							WNT5A							β-actin
	size	45-kDa							45-kDa							42-kDa
	dilution	1/1000							1/1000							1/5000
	Blocking	2% skim milk							2% skim milk							2% skim milk

## Sheet: figure4
	Western Blotting
	A	Melatonin (mM)				Melatonin (mM)				Melatonin (mM)
		0	0.75	1		0	0.75	1		0	0.75	1
	Original band
	Antibody	p-β-catenin				β-catenin				β-actin
	size	92-kDa				92-kDa				42-kDa
	dilution	1/1000				1/1000				1/5000
	Blocking	2% skim milk				2% skim milk				2% skim milk
		41667.3	23302.8	21053.6		15662.1	30890.5	26170.4
		40039.7	27506.6	19130.8		20515.7	29306.4	32704
		39107.3	27786.1	19046.7		21004.4	45089	36302.5
	p-β-catenin/ β-catenin	2.6604	0.754367	0.804479
		1.95166	0.938585	0.584966
		1.86187	0.61625	0.524667
	aver	2.15798	0.769734	0.638038
	p-β-catenin/ β-catenin/aver*100	123.282	34.9572	37.2793
		90.4396	43.4938	27.1072
		86.2784	28.5569	24.3129
	%aver	100	35.6693	29.5665
	Western Blotting
	B	Melatonin (mM)_cytoplasm			Melatonin (mM)_Nucleus				Melatonin (mM)_cytoplasm			Melatonin (mM)_Nucleus				Melatonin (mM)_cytoplasm			Melatonin (mM)_Nucleus
		0	0.75	1	0	0.75	1		0	0.75	1	0	0.75	1		0	0.75	1	0	0.75	1
	Original band
	Antibody	β-catenin							β-tublin							Lamiin A/C
	size	92-kDa							50-kDa							65-70-kDa
	dilution	1/1000							1/500							1/500
	Blocking	2% skim milk							2% skim milk							2% skim milk
		28784.4	22795	26241.9	4166.2	11485	20841.8
		22865.6	26296	23279.2	5874.69	15917.5	16214.4
		28295.3	27392.5	28347.6	5096.96	17844.7	18265.6
	nucleus/cytoplasm	0.144738	0.503836	0.79422
		0.256923	0.605321	0.69652
		0.180135	0.651444	0.644344
	aver	0.193932	0.586867	0.711695
	nucleus/cytoplasm/aver*100	74.6336	259.801	409.535
		132.481	312.13	359.157
		92.8855	335.914	332.253
	nucleus/cytoplasm/aver*100	100	302.615	366.982
	Luciferase reporter assay
	C	Melatonin (mM)				Melatonin (mM)				Melatonin (mM)				Melatonin (mM)
	12H	0	0.75	1		0	0.75	1	24H	0	0.75	1		0	0.75	1
	lucifer	3640	3549	3017	β-gal	1415	970	872	lucifer	3248	4256	3083	β-gal	2250	2207	1443
		3832	3699	3189		1420	917	853		3357	4063	3174		2390	2363	1383
		3551	3306	2978		1490	1052	839		3326	4340	3125		2619	2453
	lucifer/β-gal	2.57244	3.65876	3.45986					lucifer/β-gal	1.44356	1.92841	2.13652
		2.69859	4.03381	3.73857						1.4046	1.71942	2.29501
		2.38322	3.14259	3.54946						1.26995	1.76926	2.25958
	aver	2.55142	3.61172	3.58263					aver	1.3727	1.8057	2.23037
	lucifer/β-ga l/aver*100	100.824	143.401	135.606					lucifer/β-ga l/aver*100	105.162	140.483	155.643
		105.768	158.101	146.529						102.324	125.258	167.189
		93.4078	123.17	139.117						92.5146	128.889	164.608
	%aver	100	141.557	140.417					%aver	100	131.543	162.48

## Sheet: figure5
	Western Blotting
	A	Melatonin (mM)			Melatonin (mM)			Melatonin (mM)			Melatonin (mM)			Melatonin (mM)			Melatonin (mM)			Melatonin (mM)			Melatonin (mM)			Melatonin (mM)			Melatonin (mM)			Melatonin (mM)
		0	1		0	1		0	1		0	1		0	1		0	1		0	1		0	1		0	1		0	1		0	1
	Antibody	p-AKT			AKT			P-PKA			PKA			P-ERK			ERK			P-P38			P38			P-SRC			SRC			β-actin
	size	60-kDa			60-kDa			42-kDa			42-kDa			42,44-kDa			42,44-kDa			43-kDa			38-kDa			60-kDa			60-kDa			42-kDa
	dillution	1/1000			1/1000			1/1000			1/1000			1/1000			1/1000			1/1000			1/1000			1/1000			1/1000			1/5000
	Blocking	2% skim milk			2% skim milk			2% skim milk			2% skim milk			2% skim milk			2% skim milk			2% skim milk			2% skim milk			2% skim milk			2% skim milk			2% skim milk
	Western Blotting
	B	Melatonin (mM)				Melatonin (mM)			B	Melatonin (mM)				Melatonin (mM)				Melatonin (mM)
		0	0.75	1		0	0.75	1		0	0.75	1		0	0.75	1		0	0.75	1
	Antibody	p-AKT				AKT			Antibody	P-GSK3β				GSK3β				β-actin
	size	60-kDa				60-kDa			size	46-kDa				46-kDa				42-kDa
	dillution	1/1000				1/1000			dillution	1/1000				1/1000				1/5000
	Blocking	2% skim milk				2% skim milk			Blocking	2% skim milk				2% skim milk				2% skim milk
		10800	24216.2	40736.4		31123.4	31782.9	31917.3		13429.8	26047.9	22565.9		28430.1	30535	25488.8
		16800.3	33358	38202.6		29473.1	30029.6	32289.9		9614.71	20882.7	23773.3		27023.4	29551.7	23967.6
		13242.7	35497.3	39072.7		32144.6	31131.4	31549.3		11585.6	22895.7	25761.9		30053.7	31575.6	32232.2
	P-AKT/AKT	0.347007	0.761924	1.27631					P-GSK3β/GSK3β	0.472379	0.85305	0.885326
		0.570022	1.11084	1.18311						0.355792	0.706648	0.991894
		0.411974	1.14024	1.23846						0.385495	0.725108	0.799257
	aver	0.443001	1.00433	1.23263					aver	0.404555	0.761602	0.892159
	P-AKT/AKT/aver*100	78.3309	171.992	288.106					P-GSK3β/GSK3β/aver*100	116.765	210.861	218.839
		128.673	250.753	267.068						87.9464	174.673	245.182
		92.9962	257.391	279.562						95.2886	179.236	197.565
	aver%	100	226.712	278.245					aver%	100	188.257	220.529
	Western Blotting
	C	Melatonin(1mM)	-	-	+	+		Melatonin(1mM)	-	-	+	+	Melatonin(1mM)	-	-	+	+		Melatonin(1mM)	-	-	+	+	Melatonin(1mM)	-	-	+	+		Melatonin(1mM)	-	-	+	+	Melatonin(1mM)	-	-	+	+
		LY294002(20 μM)	-	+	-	+		LY294002(20 μM)	-	+	-	+	LY294002(20 μM)	-	+	-	+		LY294002(20 μM)	-	+	-	+	LY294002(20 μM)	-	+	-	+		LY294002(20 μM)	-	+	-	+	LY294002(20 μM)	-	+	-	+
	Antibody		p-AKT						AKT				Antibody	P-GSK3β						GSK3β				Antibody	P-β-catenin						β-catenin				Antibody	β-actin
	size		60-kDa						60-kDa				size	46-kDa						46-kDa				size	92-kDa						92-kDa				size	42-kDa
	dillution		1/1000						1/1000				dillution	1/1000						1/1000				dillution	1/1000						1/1000				dillution	1/5000
	Blocking		2% skim milk						2% skim milk				Blocking	2% skim milk						2% skim milk				Blocking	2% skim milk						2% skim milk				Blocking	2% skim milk
			16954.5	10872.3	28590.3	10497.1			17542.7	17542.7	18280.7	17111.9		7907.62	4216.96	11840.4	5810.5			33610.5	28111.3	30562.8	28110		4590.76	15690.4	5816.37	13840.4			14968.8	14318.1	27412.3	13934
			24758.5	13433.8	29159.2	19414.9			16466.7	15473.1	13644.2	17655.5		9329.4	6375.91	15782.6	10749			26336.5	27355.7	31204.2	37045.7		5687.3	19097	8097.25	20215.2			16642	18476.4	30271.1	16266.6
			21386.8	20064.8	30668	19374.6			18945.1	17554.3	17664.2	18452.3		6946.11	4017.44	14378.7	5721.5			30748.2	31479.6	30054.2	31774.2		5002.41	18841.7	6028.77	15647.7			15443.3	15027.9	28316.3	14017.7
	P-AKT/AKT		0.966468	0.619762	1.56396	0.61344							P-GSK3β/GSK3β	0.235272	0.15001	0.387412	0.206706							P-β-catenin/β-catenin	0.30669	1.09584	0.212181	0.993285
			1.50356	0.868205	2.13712	1.09965								0.354238	0.233075	0.505785	0.290156								0.341744	1.03359	0.267491	1.24275
			1.12888	1.14302	1.73616	1.04998								0.225903	0.12762	0.478425	0.180067								0.323921	1.25378	0.212908	1.11628
	aver		1.19964	0.876995	1.81241	0.921024							aver	0.271805	0.170235	0.457207	0.225643							aver	0.324118	1.12774	0.23086	1.11744
	P-AKT/AKT/aver*100		80.5635	51.6625	130.37	51.1356							P-GSK3β/GSK3β/aver*100	86.5593	55.1902	142.533	76.0494							P-GSK3β/GSK3β/aver*100	94.6227	338.1	65.464	306.458
			125.334	72.3724	178.147	91.6656								130.328	85.7508	186.084	106.752								105.438	318.891	82.5289	383.424
			94.1021	95.2805	144.724	87.5249								83.1124	46.9529	176.018	66.2489								99.9392	386.828	65.6885	344.406
	aver%		100	73.1051	151.08	76.7754							aver%	100	62.6313	168.212	83.0167							aver%	100	347.94	71.2271	344.762
	Luciferase reporter assay
	D	Melatonin (mM)			Melatonin (mM)+LY294002(20 μM)				Melatonin (mM)			Melatonin (mM)+LY294002(20 μM)				*
	24H	0	0.75	1	0	0.75	1		0	0.75	1	0	0.75	1
	lucifer	10572	15524	15769	6886	6351	6395	β-gal	3836	4594	3963	4224	4317	4461
		10884	14504	15251	6291	6317	6103		3908	4620	3924	4641	4417	4404
		10359	15116	15888	6276	6136	6016		4347	4841	4003	4982	4700	4711
	aver	10605	15048	15636	6484.33	6268	6171.33		4030.33	4685	3963.33	4615.67	4478	4525.33
	lucifer/β-gal	2.756	3.37919	3.97906	1.63021	1.47116	1.43354
		2.78506	3.13939	3.8866	1.35553	1.43016	1.38579
		2.38302	3.1225	3.96902	1.25974	1.30553	1.27701
	aver	2.64136	3.21369	3.94489	1.41516	1.40228	1.36544
	lucifer/β-ga l/aver*100	104.34	127.934	150.644	61.7186	55.6971	54.2726
		105.44	118.855	147.144	51.3193	54.1447	52.4649
		90.2196	118.216	150.264	47.6927	49.4265	48.3468
	%aver	100	121.668	149.351	53.5769	53.0895	51.6948
