# Supplementary material for: Melatonin increases growth properties in human dermal papilla spheroids by activating AKT/GSK3β/β-Catenin signaling pathway
Source: PeerJ journal article supplement (doi:10.7717/peerj.13461), 2022-05-18
Supplement: Supplementary_file_2.zip [file Supplementary_file_2.zip]

## Sheet: Sheet1
Fig S1(B)
	Luciferase reporter assay
		Melatonin (mM)					Melatonin (mM)					Melatonin (mM)					Melatonin (mM)
	24h	0	10 nM	10 μM	1 mM		0	10 nM	10 μM	1 mM	48h	0	10 nM	10 μM	1 mM		0	10 nM	10 μM	1 mM
	lucifer	19701	18036	23255	26263	β-gal	4209	4189	4242	4311	lucifer	24290	26105	29594	32310	β-gal	4187	4245	4111	4125
		19206	17676	22767	23821		4447	4048	4171	4295		23428	25796	30071	31430		4236	4288	3997	4307
		18779	17431	22776	24149		4343	4262	4420	4209		23803	25682	29696	31509		4136	4069	4009	4128
	lucifer/β-gal	4.68068	4.30556	5.48208	6.09209						lucifer/β-gal	5.80129	6.14959	7.19874	7.83273
		4.31887	4.3666	5.4584	5.54622							5.53069	6.01586	7.52339	7.29742
		4.32397	4.08986	5.15294	5.73747							5.75508	6.31162	7.40733	7.63299
	aver	4.44117	4.25401	5.36448	5.79192						aver	5.69569	6.15902	7.37649	7.58771
	lucifer/β-ga l/aver*100	105.393	96.9465	123.438	137.173						lucifer/β-ga l/aver*100	101.854	107.969	126.389	137.52
		97.2461	98.3209	122.905	124.882							97.1031	105.621	132.089	128.122
		97.361	92.0897	116.027	129.188							101.043	110.814	130.052	134.014
	%aver	100	95.7857	120.79	130.414						%aver	100	108.135	129.51	133.219
